# Supplementary material for: Determinants of the acceptability of health problems in different ages: exploring a new application of the EQ VAS
Source: PubMed Central journal article supplement (PMC6544591; doi:10.1007/s10198-019-01060-3), 2019-05-20
Supplement: 10198_2019_1060_MOESM1_ESM.pdf [file 10198_2019_1060_MOESM1_ESM.pdf]

**Determinants of the acceptability of health problems in different ages: exploring a new application of the EQ VAS**

**Authors**

Zsombor Zrubka, Zoltán Hermann, László Gulácsi, Valentin Brodzky, Fanni Rencz, Márta Péntek

**Correspondence:** Zsombor Zrubka, Department of Health Economics, Corvinus University of Budapest, Fővám tér 8., H-1093 Budapest, Hungary e-mail: [zsombor.zrubka@un-corvinus.hu](mailto:zsombor.zrubka@un-corvinus.hu), tel: +36-1-482-5308

**Journal:** European Journal of Health Economics

**Supplementary Figure S1. Sample question of acceptable health problems by EQ-5D-3L dimensions**

- *Can you indicate beyond what age you consider the specified level of problems with 'mobility' to be acceptable?*  
(Please indicate below the relevant age categories)

| Age category               |                            |                            |                            |                            |                            |                           |
|----------------------------|----------------------------|----------------------------|----------------------------|----------------------------|----------------------------|---------------------------|
| Beyond<br>the age<br>30    | Beyond<br>of the age<br>40 | Beyond<br>of the age<br>50 | Beyond<br>of the age<br>60 | Beyond<br>of the age<br>70 | Beyond<br>of the age<br>80 | Never<br>of the age<br>of |
| Some problems with walking |                            |                            |                            |                            |                            |                           |
| Confined to bed            |                            |                            |                            |                            |                            |                           |

Ref: Brouwer et al. (2005) [8], replicated with copyright from the publisher Elsevier, under license number 4547720239361
