# Supplementary material for: Determinants of the acceptability of health problems in different ages: exploring a new application of the EQ VAS
Source: Eur J Health Econ. 2019 May 20;20(Suppl 1):31–41. doi: 10.1007/s10198-019-01060-3 (PMC6544591; doi:10.1007/s10198-019-01060-3)

# **Determinants of the acceptability of health problems in different ages: exploring a new application of the EQ VAS**

## **Authors**

Zsombor Zrubka, Zoltán Hermann, László Gulácsi, Valentin Brodszky, Fanni Rencz, Márta Péntek

**Correspondence:** Zsombor Zrubka, Department of Health Economics, Corvinus University of Budapest, Fővám tér 8., H-1093 Budapest, Hungary e-mail: [zsombor.zrubka@un-corvinus.hu](mailto:zsombor.zrubka@un-corvinus.hu), tel: +36-1-482-5308

**Journal:** European Journal of Health Economics

## Supplementary Figure S2. Modified EQ VAS to measure acceptable health states in different ages

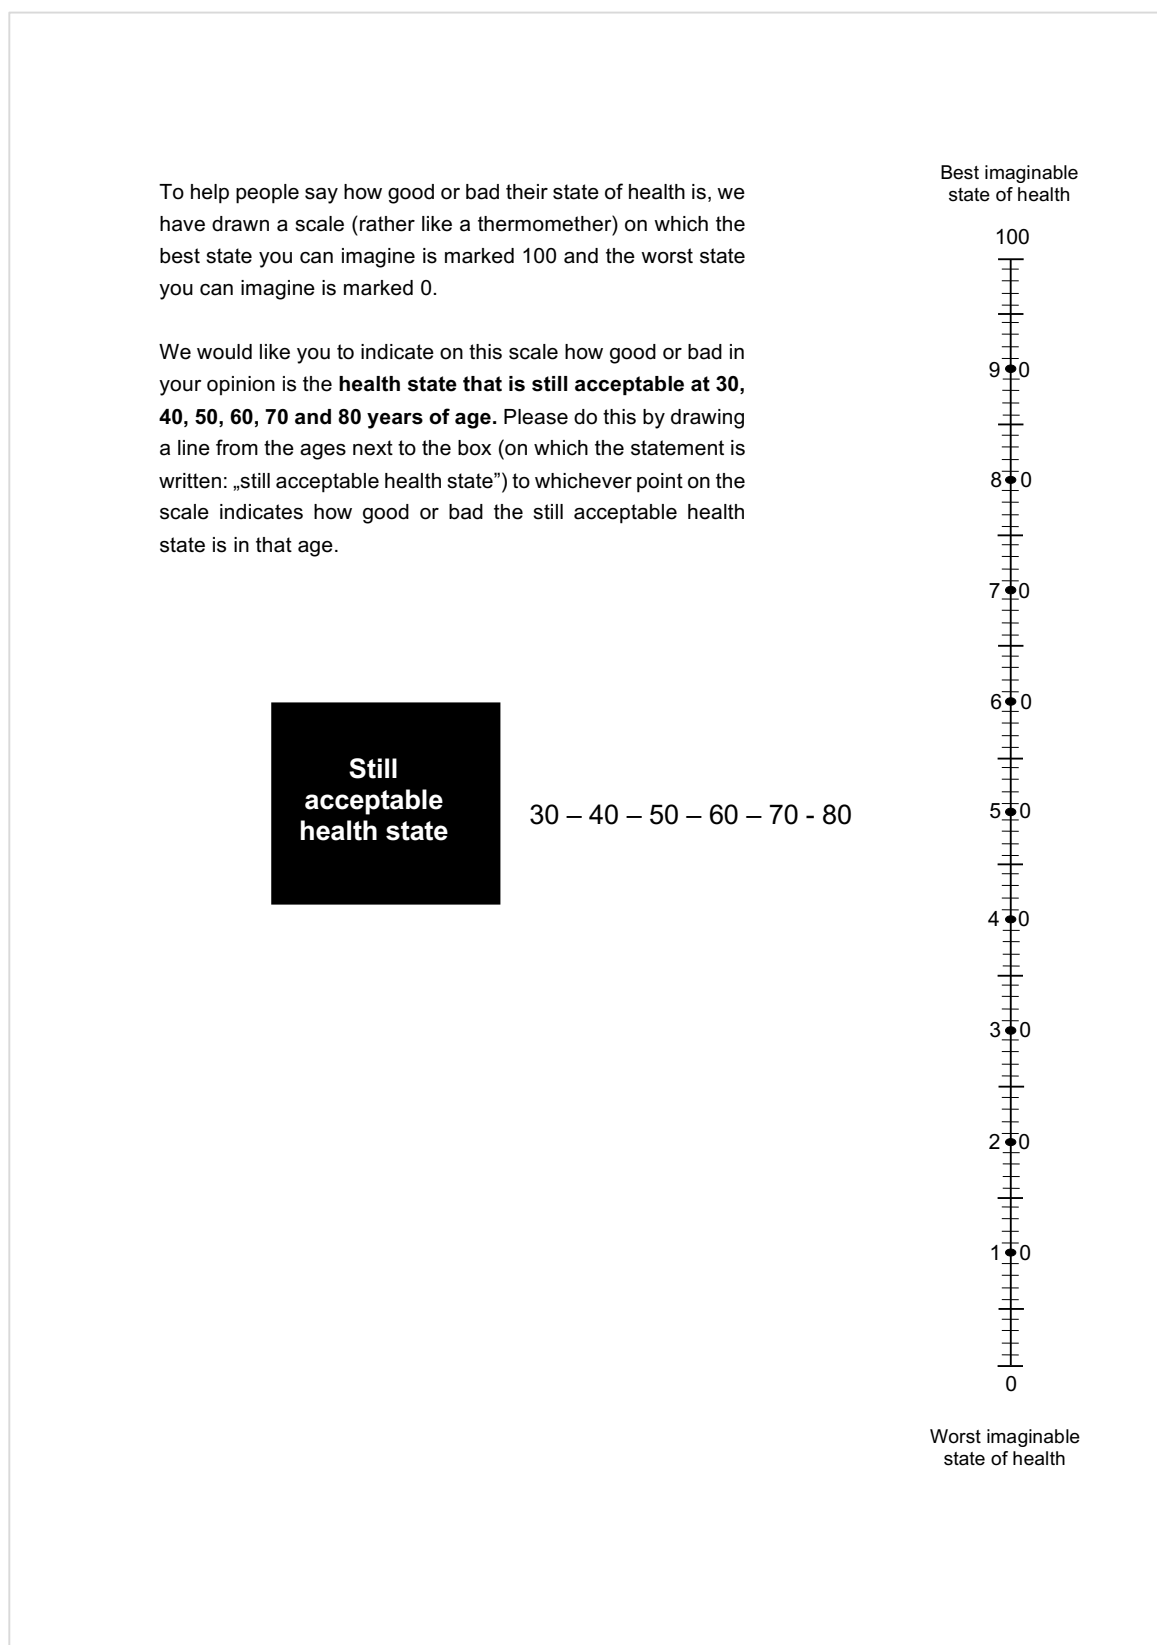

Supplement: Supplementary file 2 — Supplementary material 2 (PDF 105 kb) [file 10198_2019_1060_MOESM2_ESM.pdf]
